# Supplementary material for: Spiro[fluorene-9,9′-xanthene]-based universal hosts for understanding structure–property relationships in RGB and white PhOLEDs
Source: Royal Society of Chemistry journal article supplement (doi:10.1039/c5ra00694e), 2015-01-01
Supplement: c5ra00694e1.pdf [file c5ra00694e1.pdf]

# **Spiro[fluorene-9,9'-xanthene]-based universal hosts for understanding structure-property relationship in RGB and white PhOLEDs**

Yan Qian,<sup>a</sup> Yeren Ni,<sup>a</sup> Shouzhen Yue,<sup>b</sup> Wenwen Li,<sup>a</sup> Shufen Chen,<sup>a</sup> Zhensong Zhang,<sup>b</sup> Linghai Xie,<sup>\*a</sup> Ming-Li Sun,<sup>a</sup> Yi Zhao<sup>\*b</sup> and Wei Huang<sup>\*ac</sup>

<sup>a</sup>Key Laboratory for Organic Electronics and Information Displays & Institute of Advanced Materials (IAM), Jiangsu National Synergistic Innovation Center for Advanced Materials (SICAM), Nanjing University of Posts & Telecommunications, Nanjing, 210046, China

<sup>b</sup>State Key Laboratory on Integrated Optoelectronics, College of Electronic Science and Engineering, Jilin University, 2699 Qianjin Street, Changchun 130012, China

<sup>c</sup>Key Laboratory of Flexible Electronics (KLOFE) & Institute of Advanced Materials (IAM), Jiangsu National Synergistic Innovation Center for Advanced Materials (SICAM), Nanjing Tech University, 30 South Puzhu Road, Nanjing 211816, China.

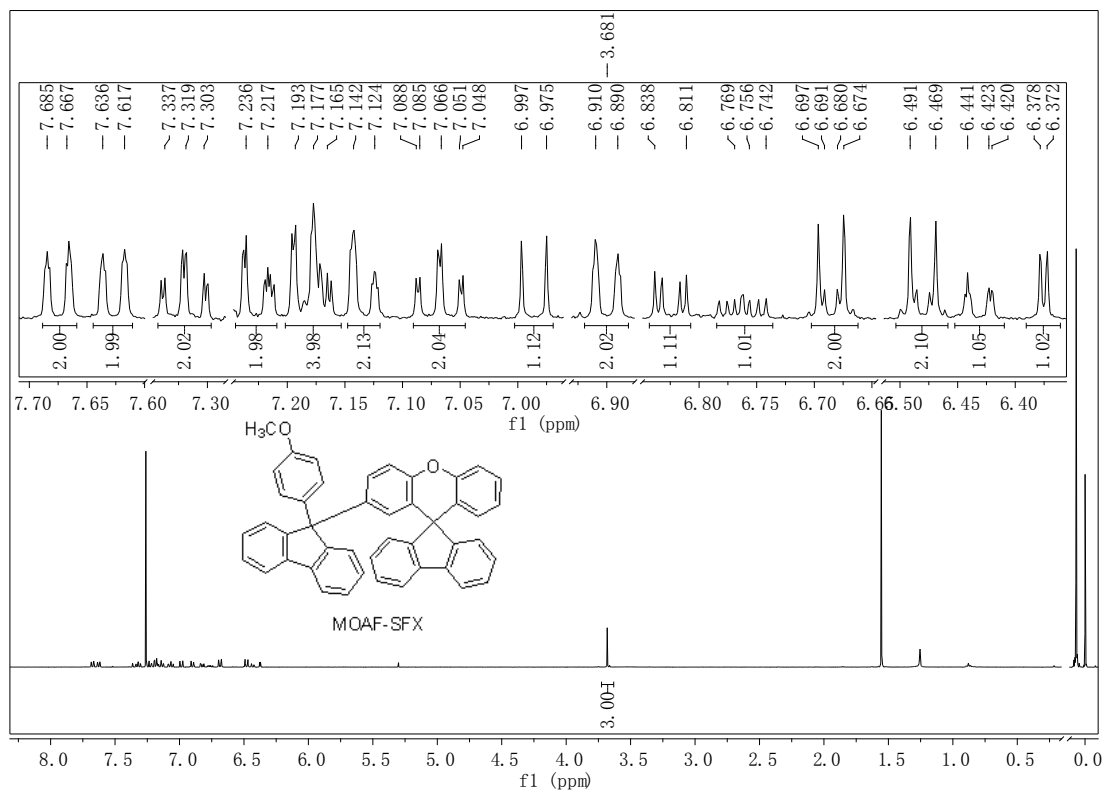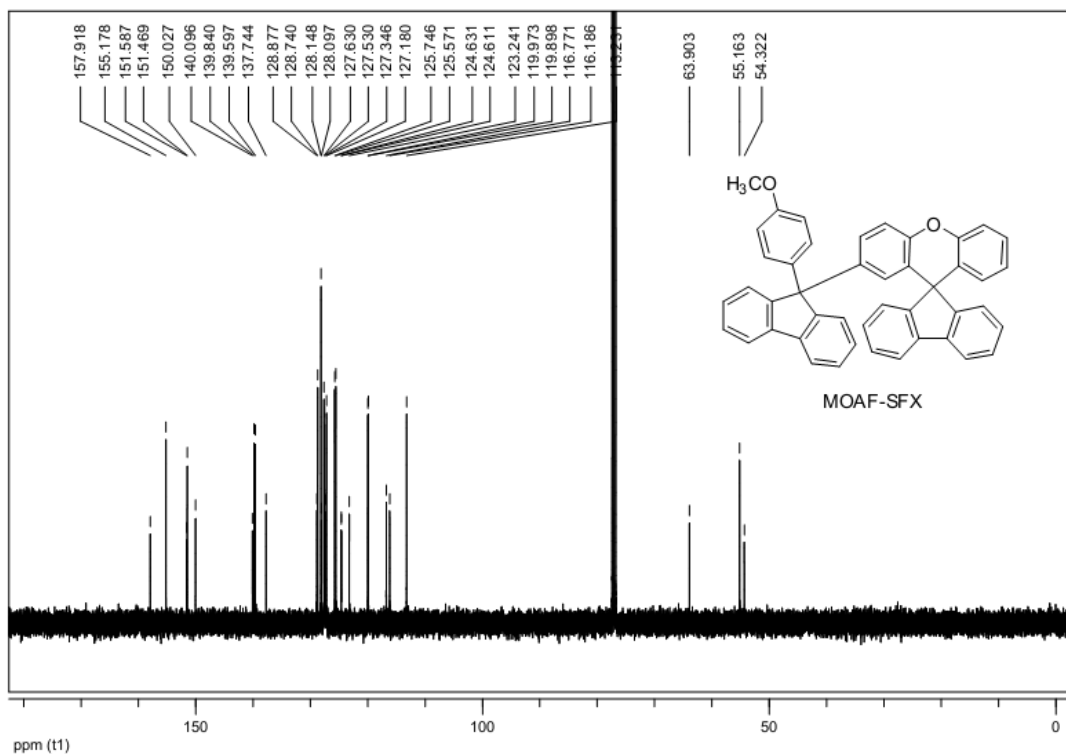

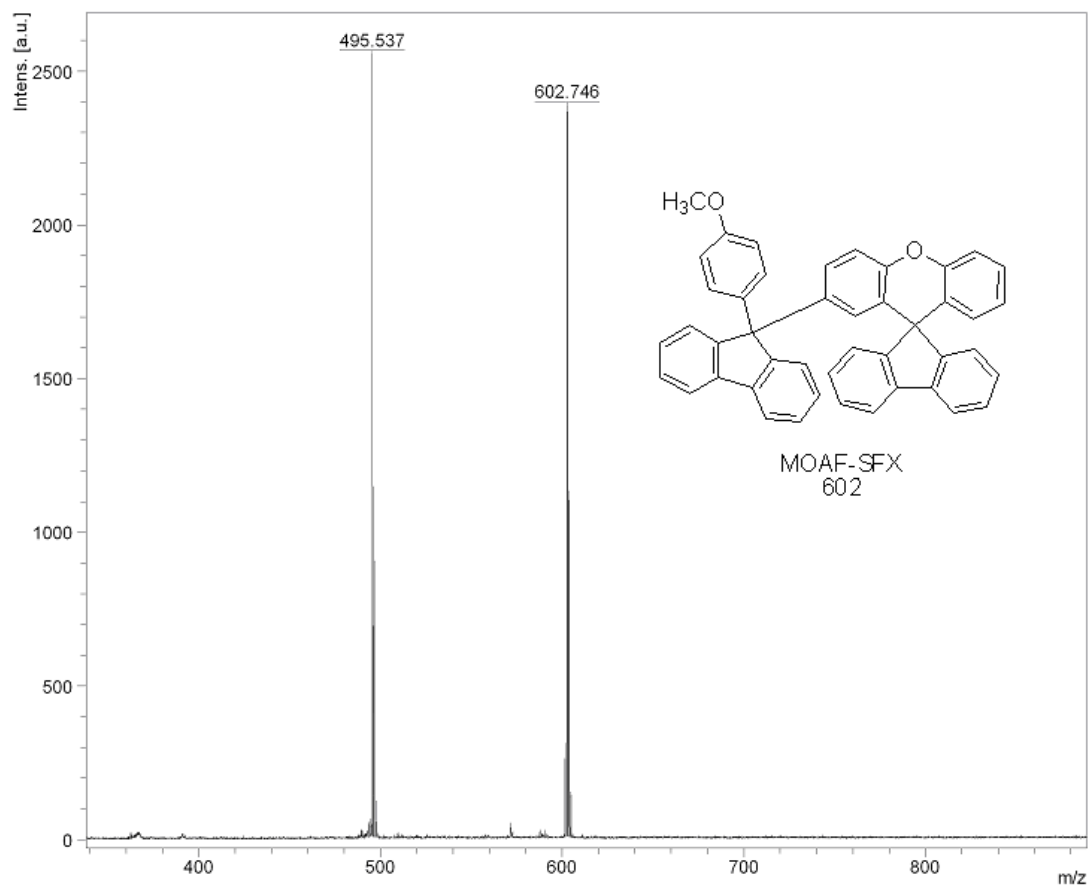

**Figure S1.** <sup>1</sup>H-NMR, <sup>13</sup>C-NMR and MALDI-TOF mass spectra of MOAF-SFX.

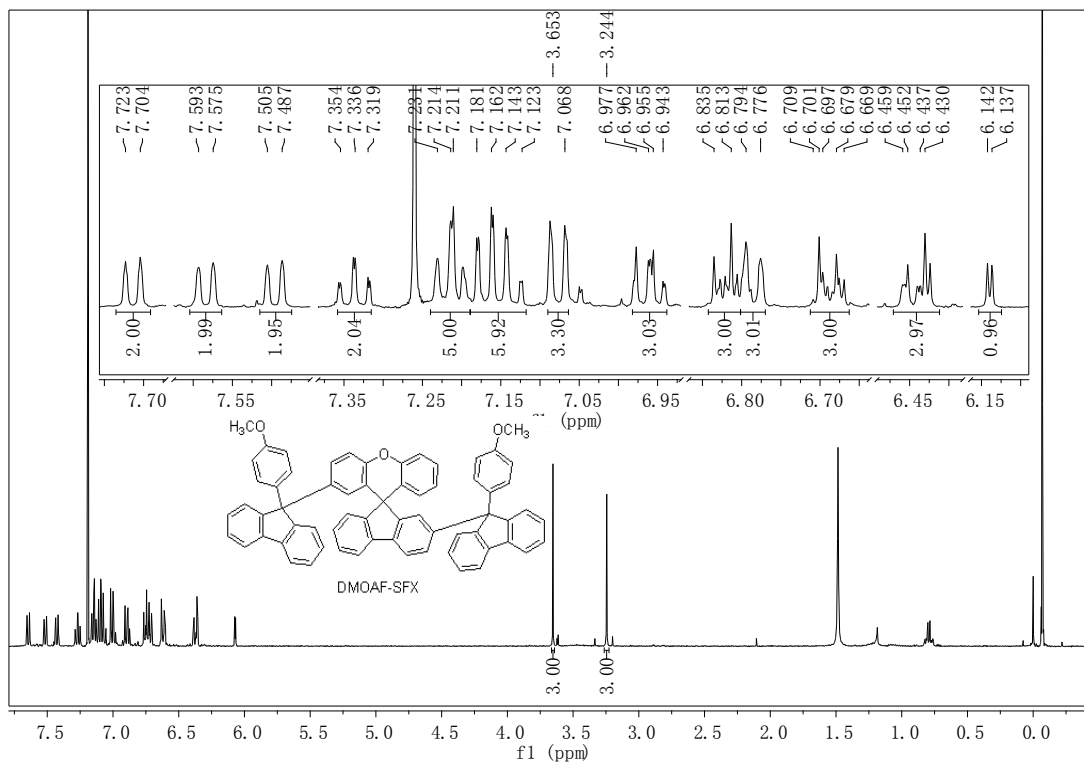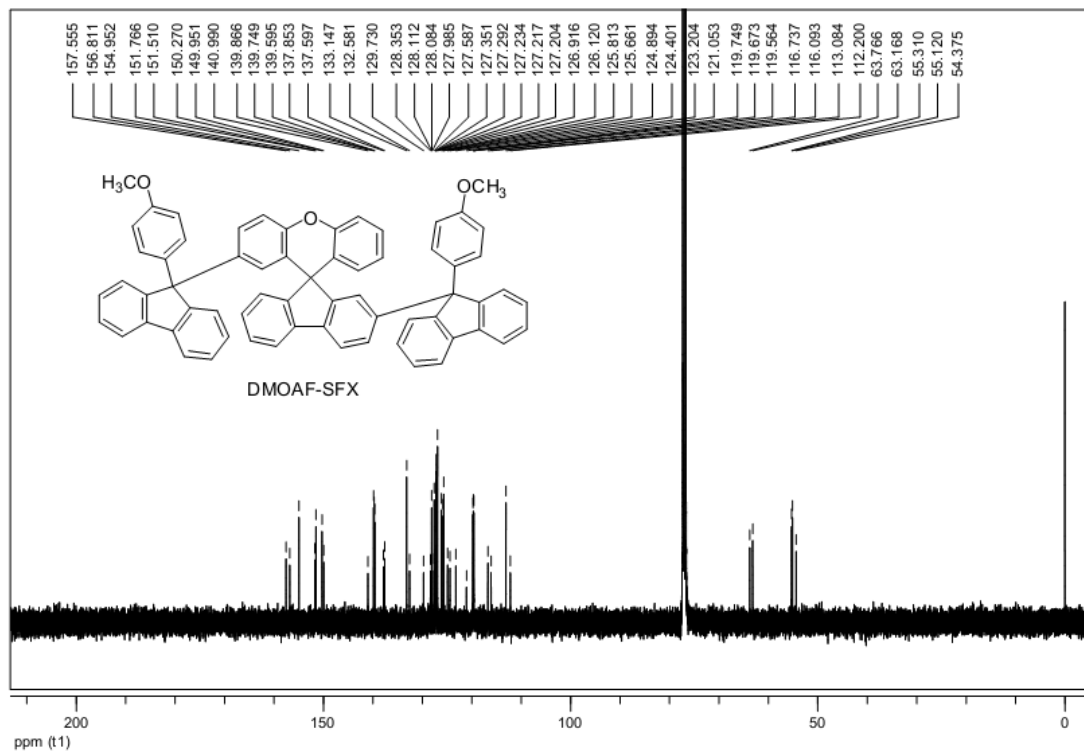

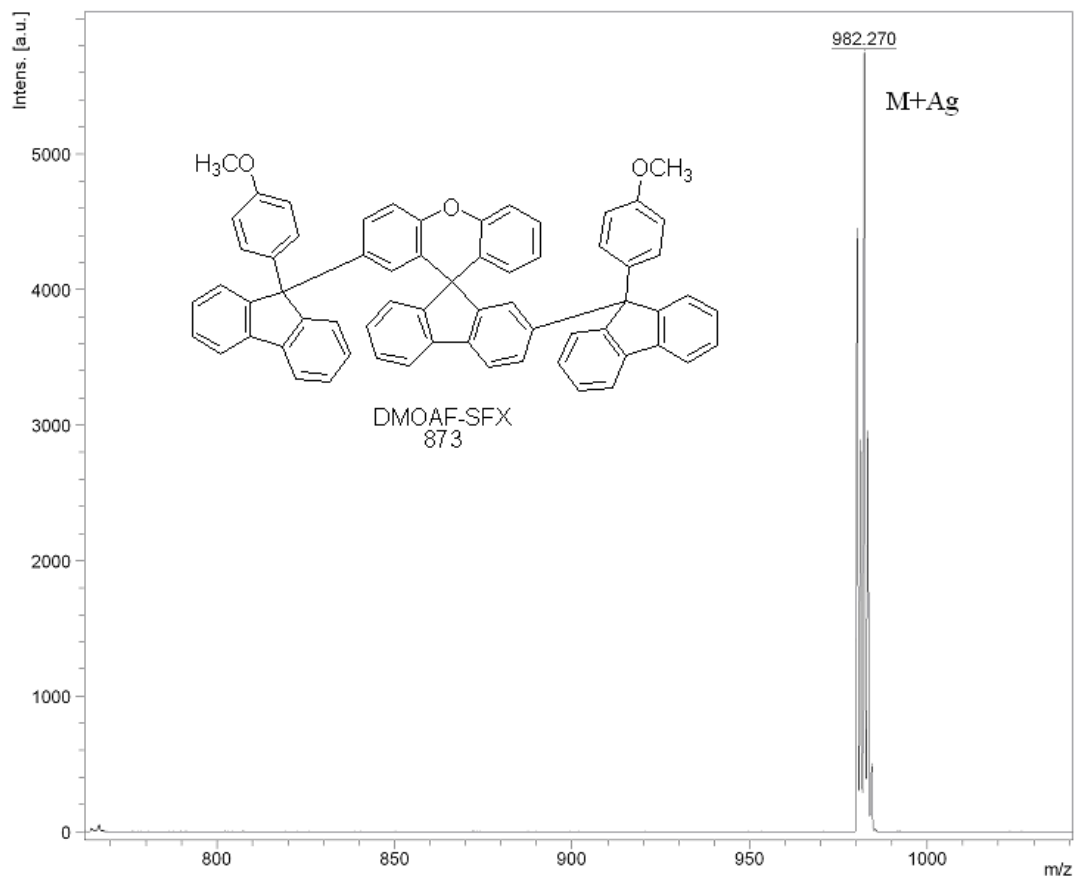

**Figure S2.**  $^1\text{H-NMR}$ ,  $^{13}\text{C-NMR}$  and MALDI-TOF mass spectra of DMOAF-SFX.

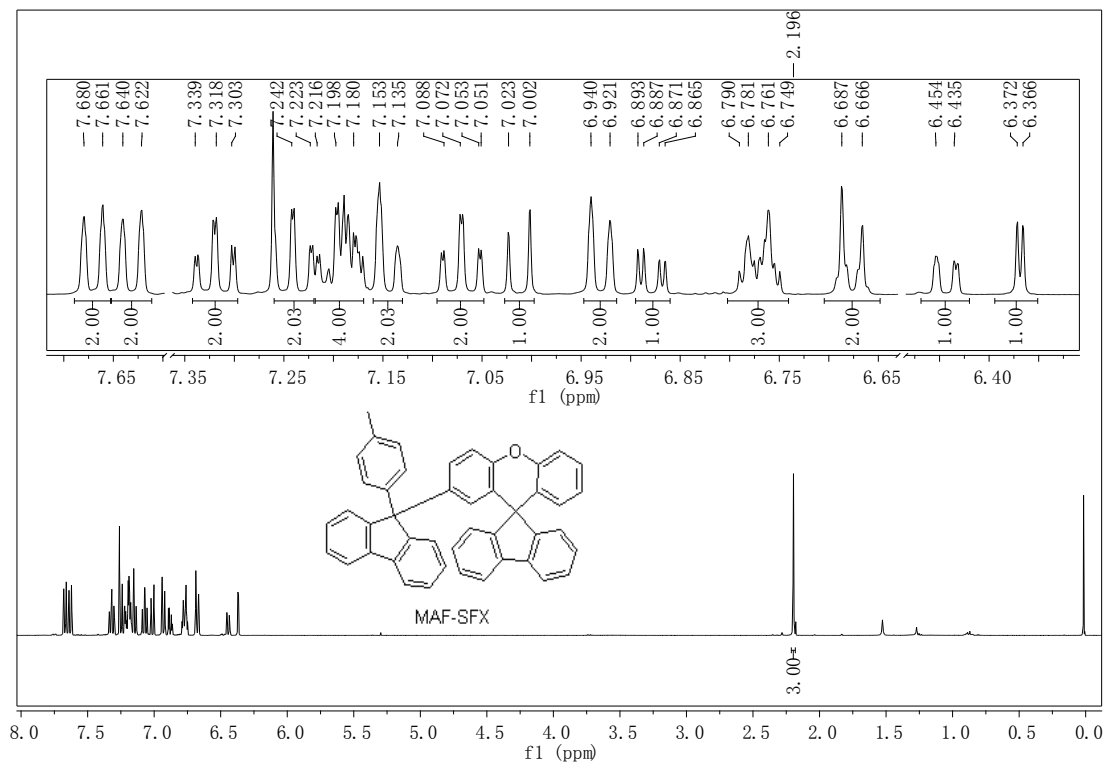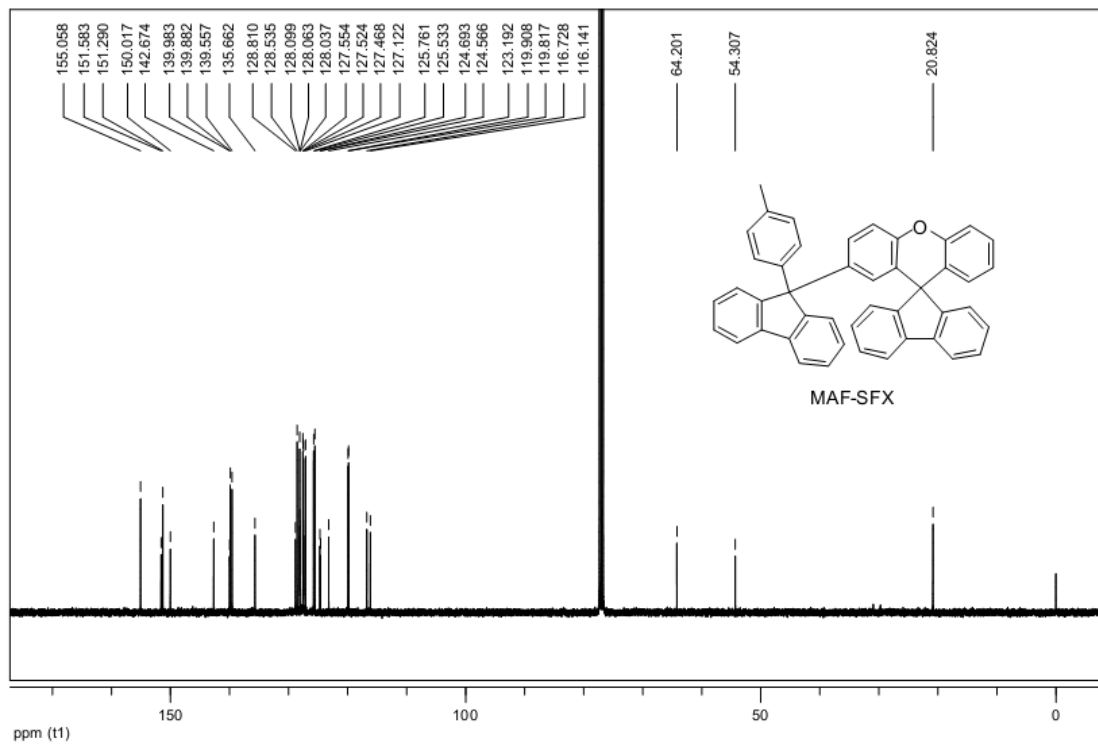

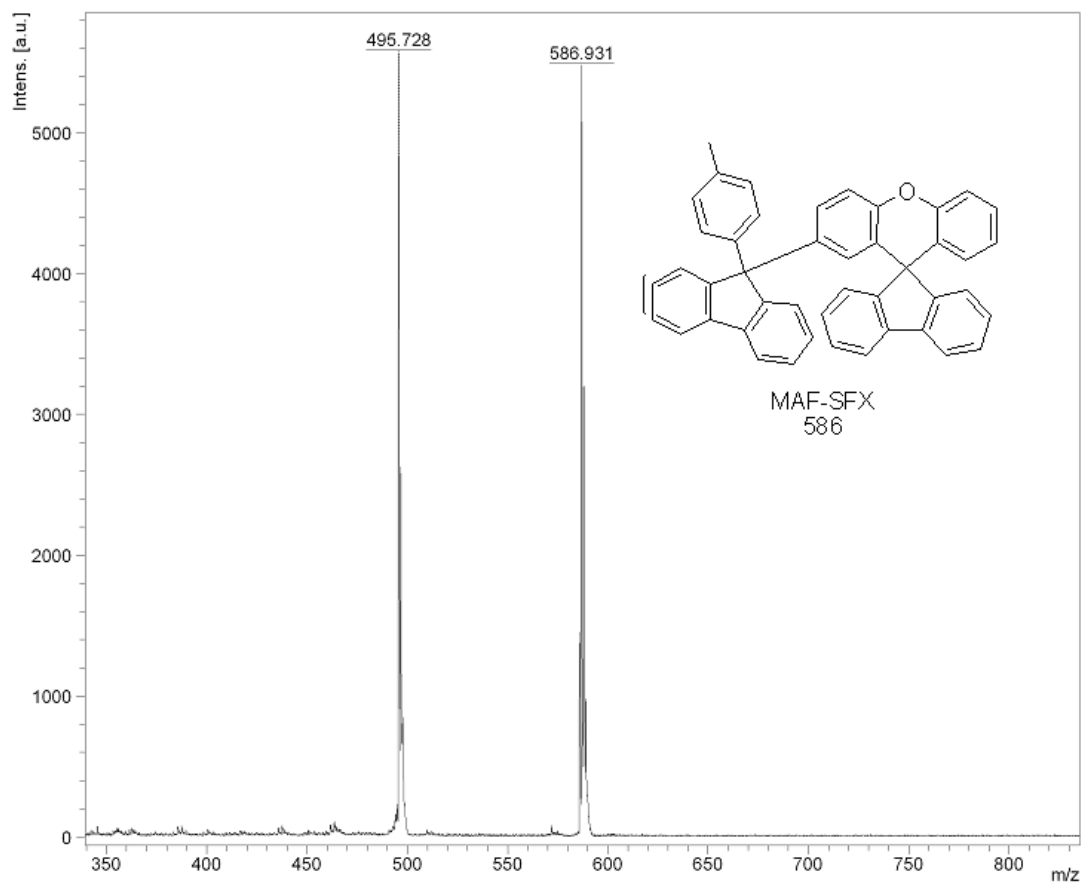

**Figure S3.**  $^1\text{H-NMR}$ ,  $^{13}\text{C-NMR}$  and MALDI-TOF mass spectra of MAF-SFX.

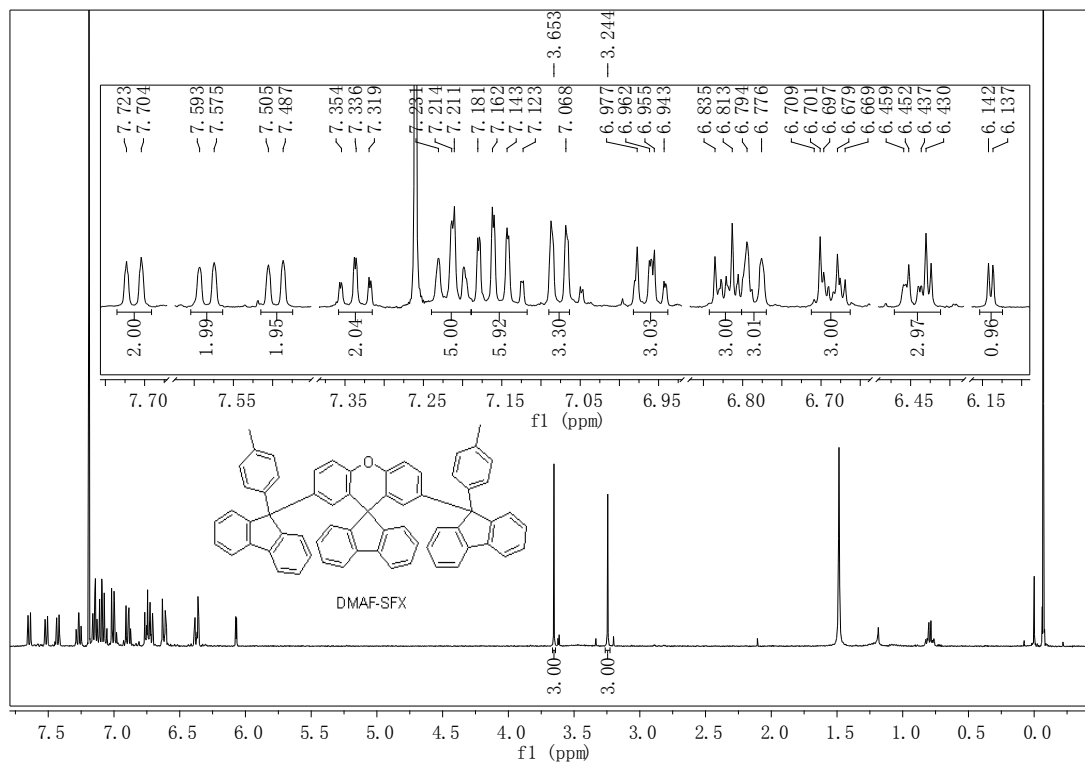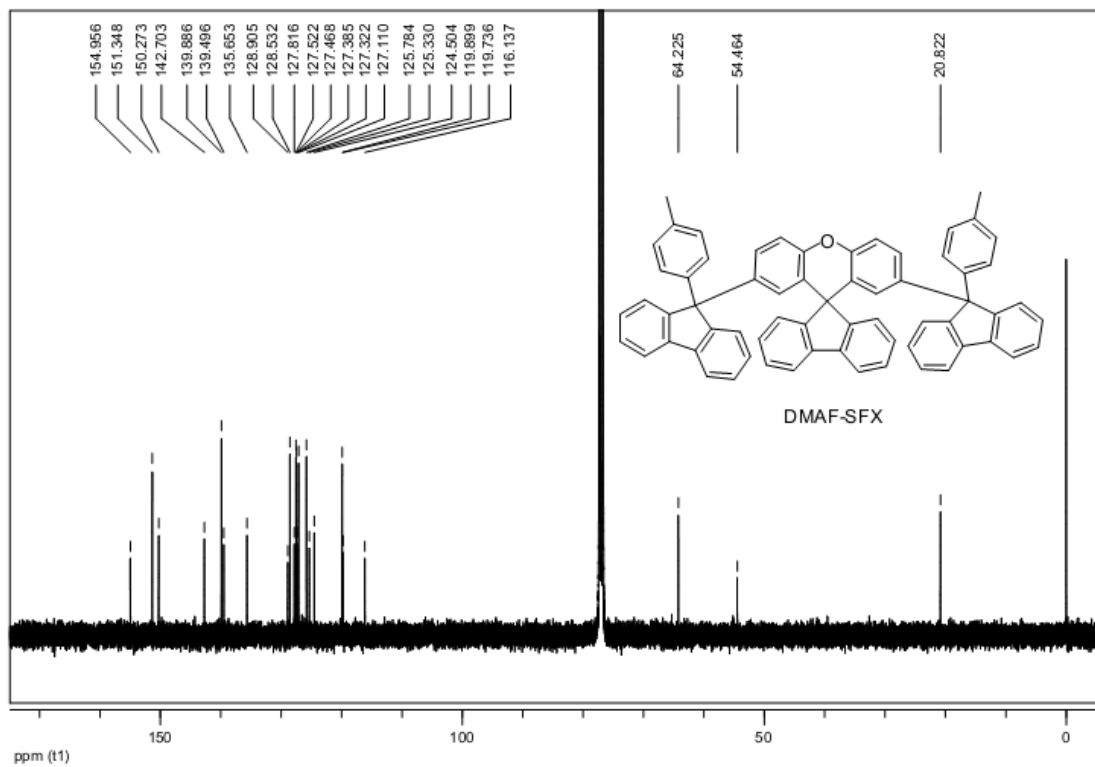



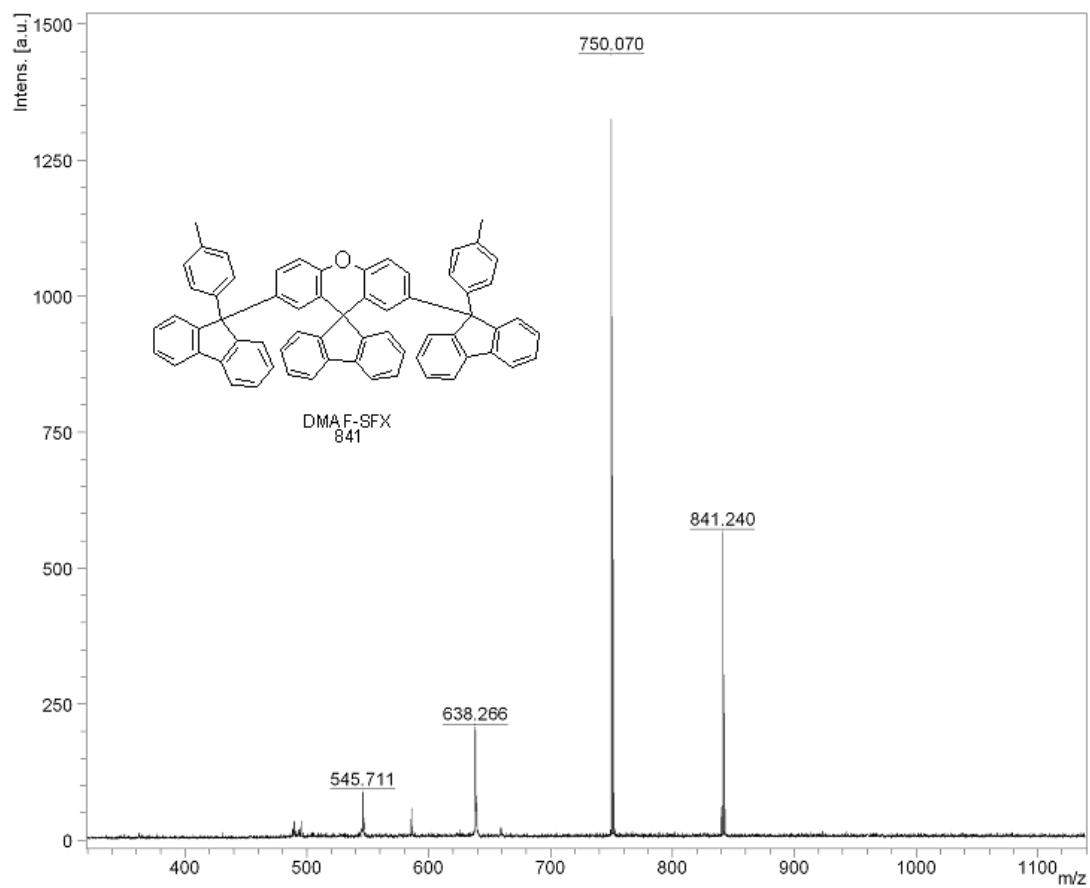

**Figure S4.**  $^1\text{H-NMR}$ ,  $^{13}\text{C-NMR}$  and MALDI-TOF mass spectra of DMAF-SFX.

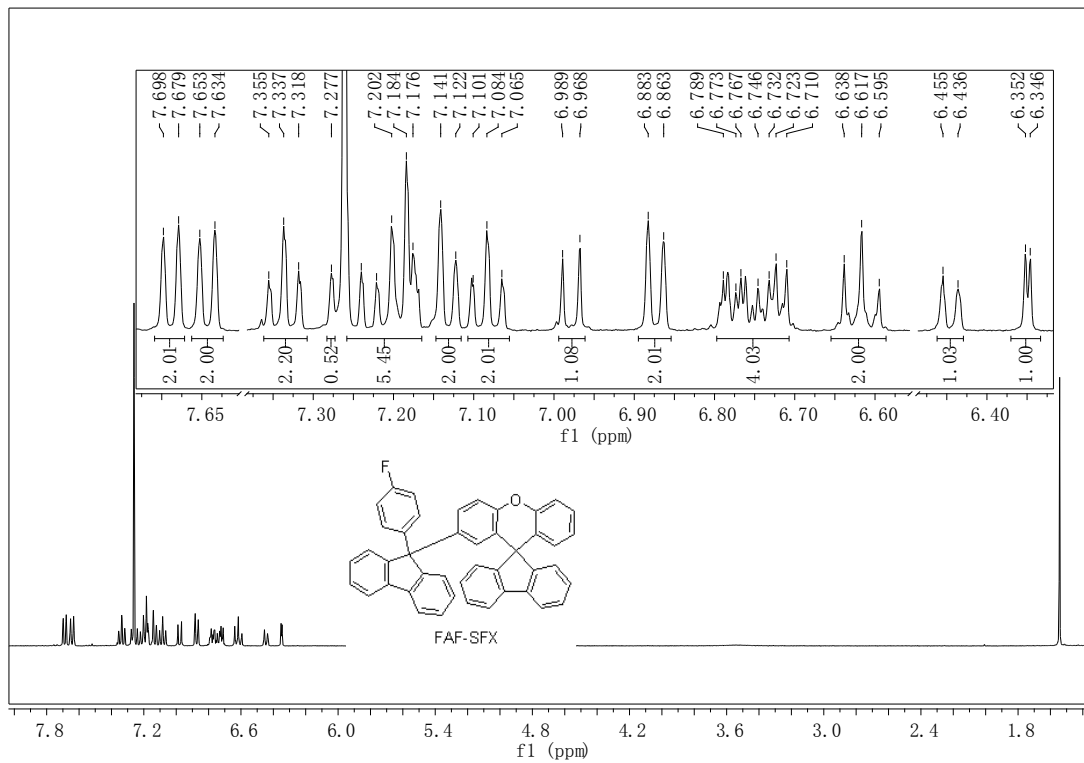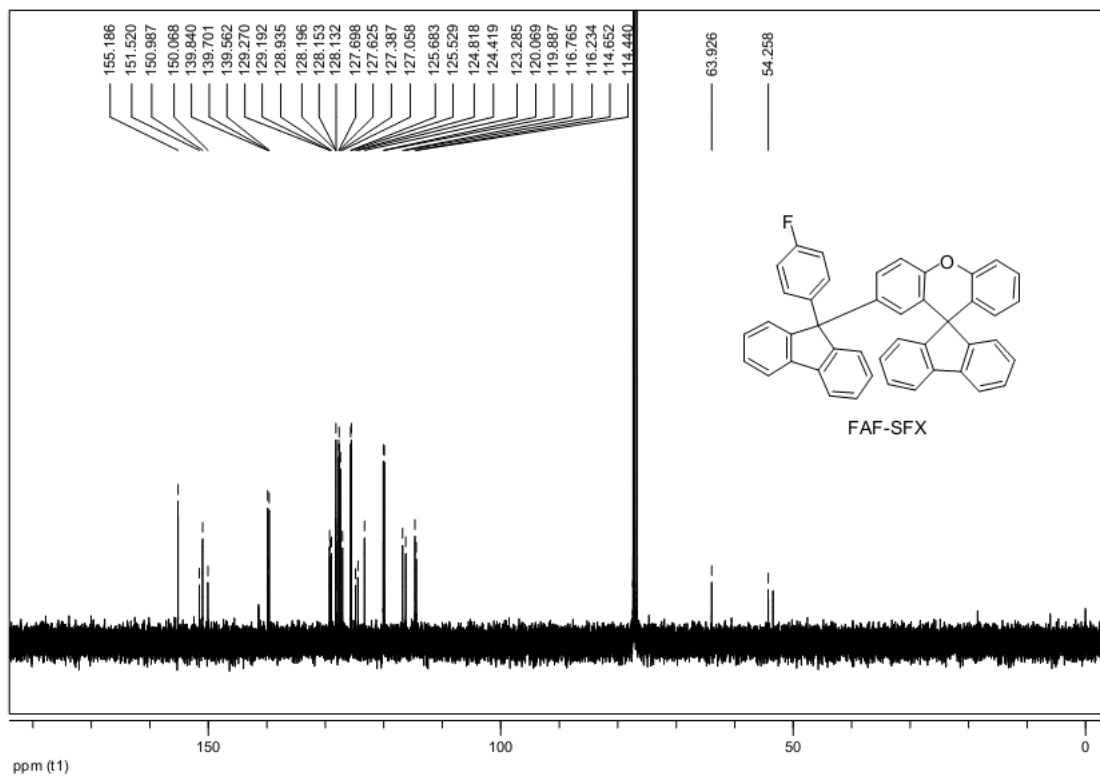

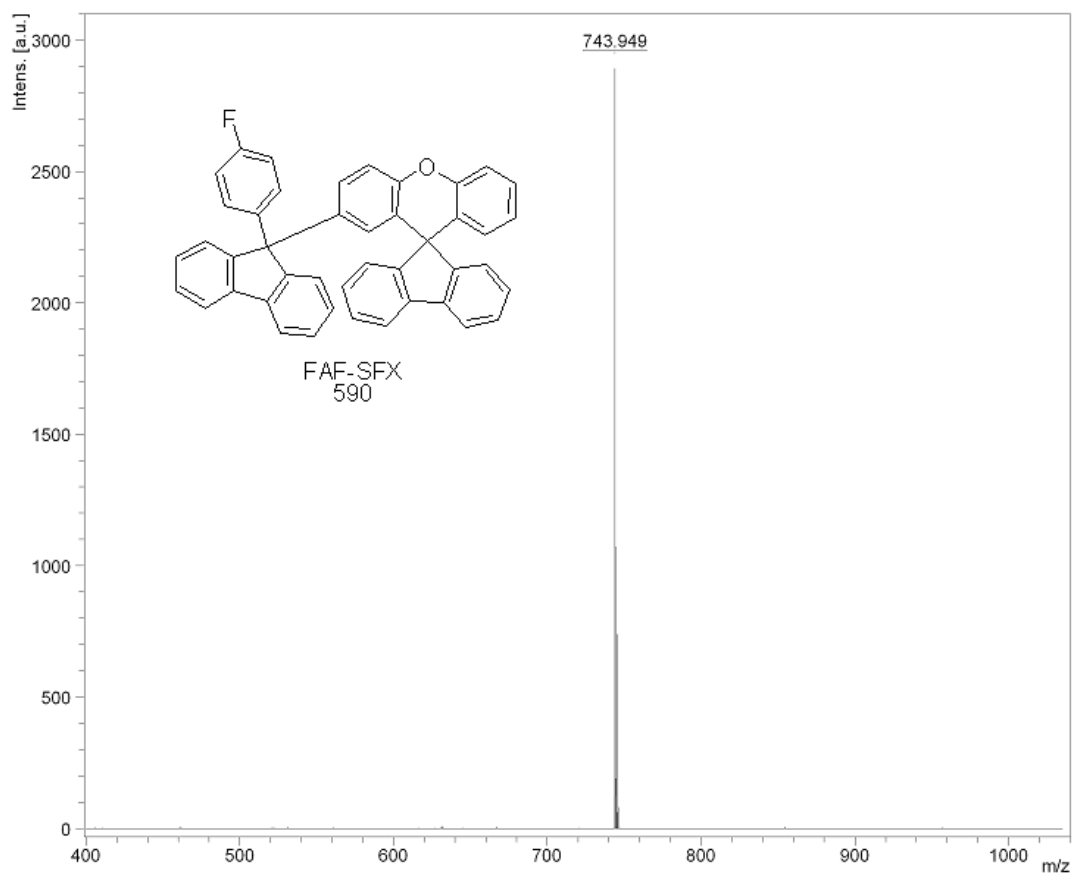

**Figure S5.**  $^1\text{H}$ -NMR,  $^{13}\text{C}$ -NMR and MALDI-TOF mass spectra of FAF-SFX.

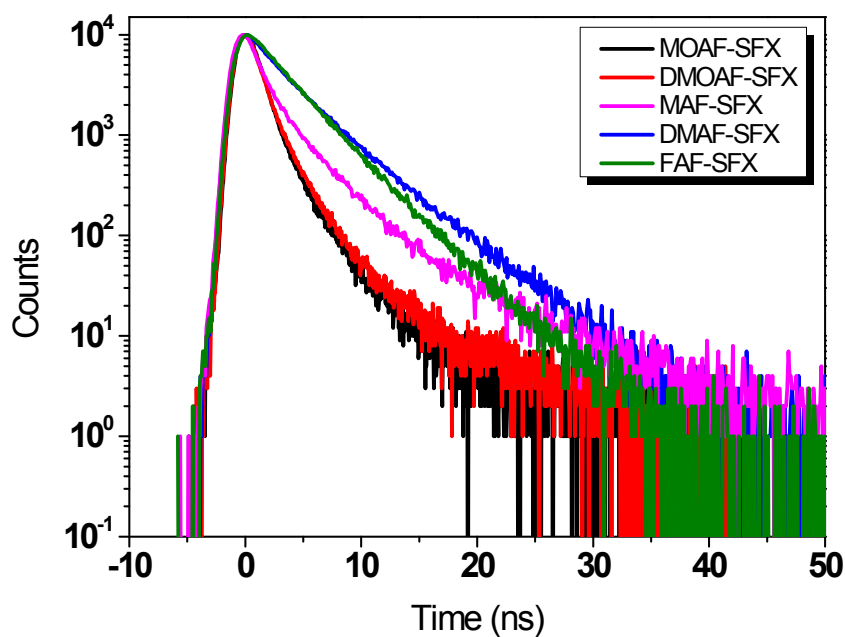

**Figure S6.** Fluorescence decay spectra of SFX/AFs hybrid compounds in powder.

**Table S1.** lifetime of SFX/AFs hybrid compounds in powder.

| Compounds | $\tau_1/\text{ns}$ | $\tau_2/\text{ns}$ | $\tau_3/\text{ns}$ | $\langle\tau\rangle^a/\text{ns}$ | $\chi^2$ |
|-----------|--------------------|--------------------|--------------------|----------------------------------|----------|
| MOAF-SFX  | 0.8683(91.37%)     | 3.3198(8.63%)      |                    | 1.1                              | 1.004    |
| DMOAF-SFX | 0.4344(41.83%)     | 1.3144(52.99%)     | 4.9090(5.18%)      | 1.1                              | 1.111    |
| MAF-SFX   | 0.8255(56.08%)     | 2.9552(36.27%)     |                    | 2.1                              | 1.023    |
| DMAF-SFX  | 1.8457(38.00%)     | 4.6546(62.00%)     | 7.4342(7.65%)      | 3.6                              | 1.156    |
| FAF-SFX   | 3.3675(94.39%)     | 5.9330(5.61%)      |                    | 3.5                              | 1.103    |

<sup>a</sup> the average lifetime

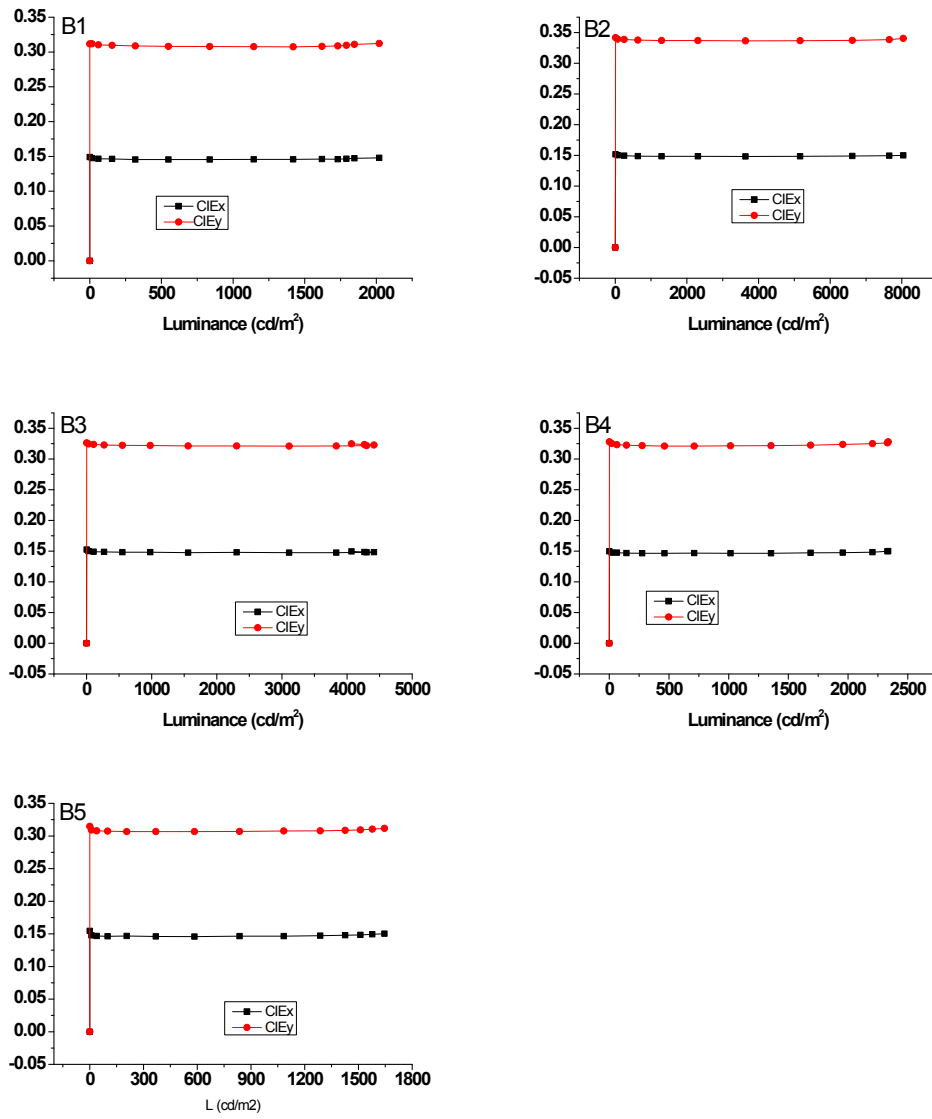

**Figure S7.** The CIE coordinates versus the luminance of the blue devices B1–B5.

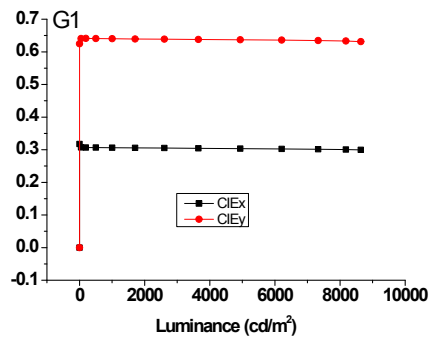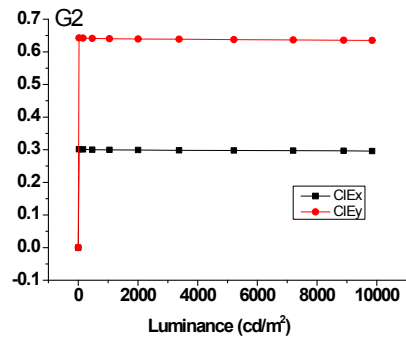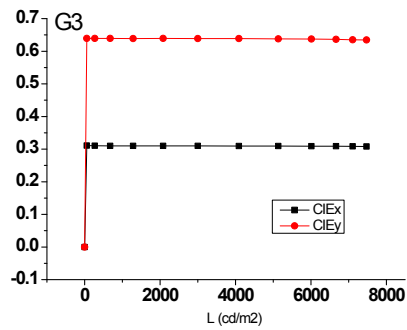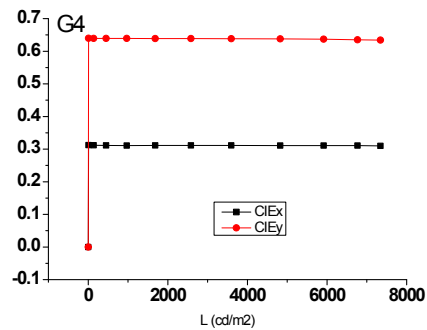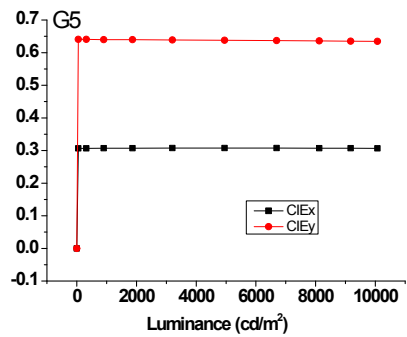

**Figure S8.** The CIE coordinates versus the luminance of the green devices G1–G5.

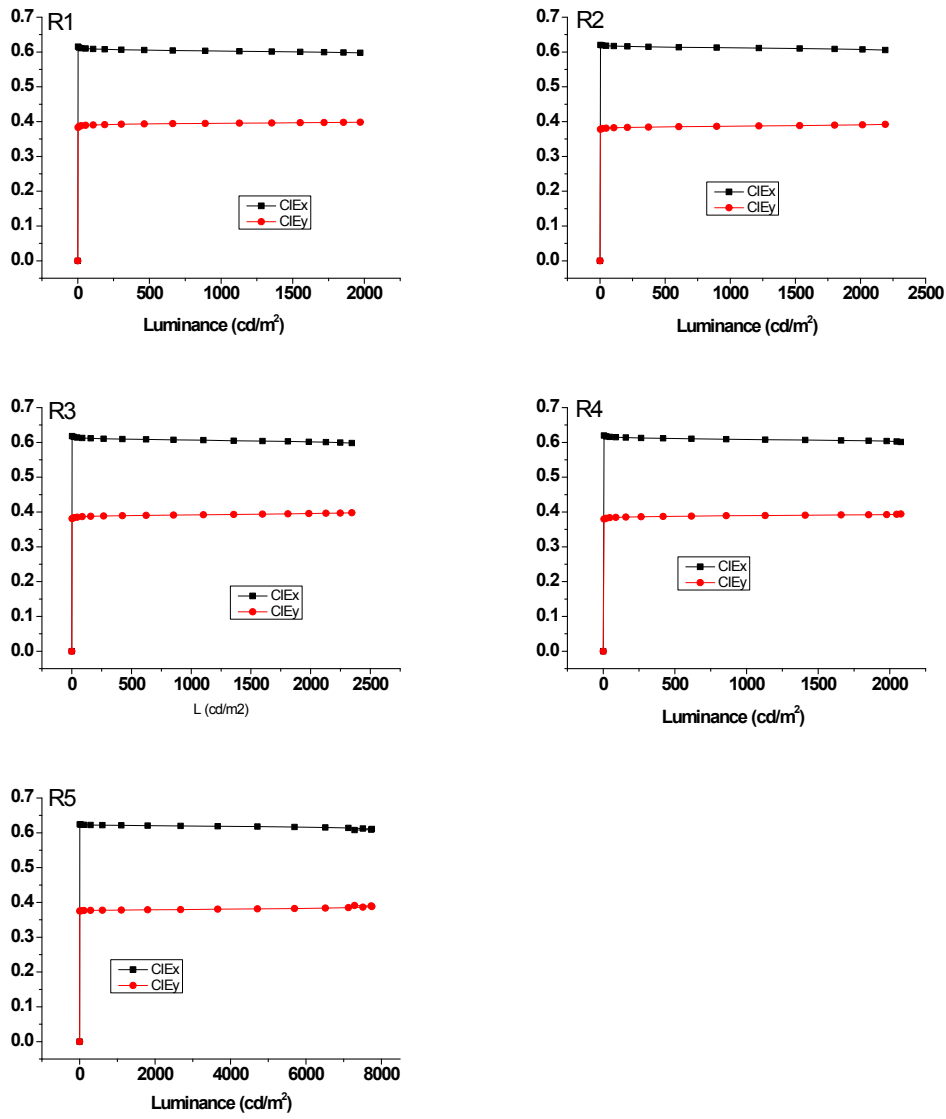

**Figure S9.** The CIE coordinates versus the luminance of the red devices R1–R5.
